# Supplementary figures and images for: Epistatic Interactions in NS5A of Hepatitis C Virus Suggest Drug Resistance Mechanisms
Source: MDPI journal article supplement (doi:10.3390/genes9070343), 2018-07-06

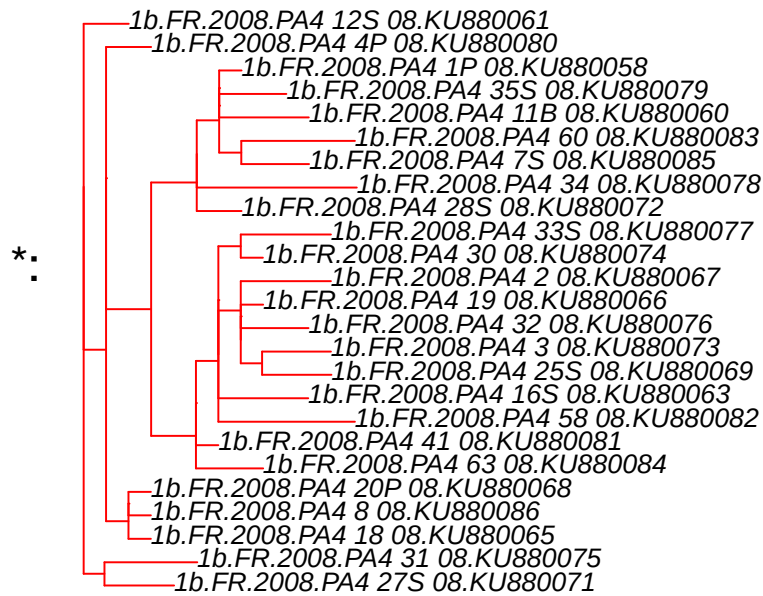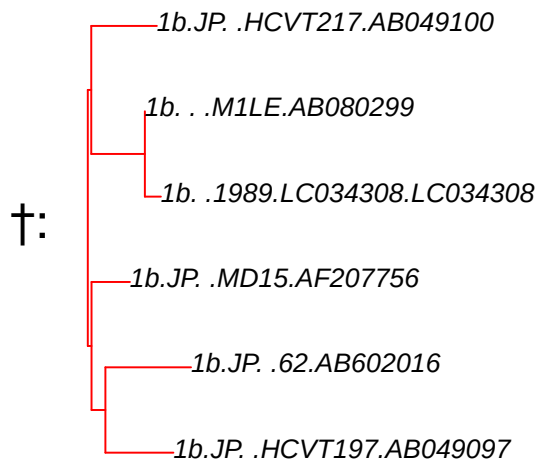

Supplement: s1 [file s1]
